# Supplementary material for: Genome Analysis Reveals Genetic Admixture and Signature of Selection for Productivity and Environmental Traits in Iraqi Cattle
Source: PubMed Central journal article supplement (PMC6646475; doi:10.3389/fgene.2019.00609), 2019-07-16
Supplement: Table_2.pdf [file Table_2.pdf]

**Supplementary Table S2a:** Gender of each sample within Jenoubi breed, location of population, date of collection, age and GPS information

| No. of sample | Gender | Location of population | Age       | GPS                        |
|---------------|--------|------------------------|-----------|----------------------------|
| 1.            | Male   | Basra\Abo-Alkasib      | 1,5 year  | N: 30.32550<br>E:48.25184  |
| 2.            | Female | Basra\ Al-Seba         | 14 months | N: 30.32550<br>E:48.25184  |
| 3.            | Female | Basra\ Al-Seba         | 3 years   | N: 30.32550<br>E:48.25184  |
| 4.            | Female | Basra\ Al-Seba         | 4 years   | N: 30.32550<br>E:48.25184  |
| 5.            | Female | Basra\ Al-Seba         | 6 years   | N: 30.32550<br>E:48.25184  |
| 6.            | Female | Basra\ Al-Seba         | 3 years   | N: 30.32550<br>E:48.25184  |
| 7.            | Female | Basra\ Al-Seba         | 5 years   | N: 30.32550<br>E:48.25184  |
| 8.            | Female | Basra\ Al-Seba         | 4 years   | N: 30.32550<br>E:48.25184  |
| 9.            | Female | Basra\ Al-Seba         | 3 years   | N: 30.32550<br>E:48.25184  |
| 10.           | Female | Amara\ Al-Musharah     | 6 years   | N: 31,86904<br>E: 47,45592 |
| 11.           | Female | Amara\ Al-Musharah     | 5 years   | N: 31,86904<br>E: 47,45592 |
| 12.           | Female | Amara\ Al-Musharah     | 11 years  | N: 31,86904<br>E: 47,45592 |
| 13.           | Female | Amara\ Al-Musharah     | 4 years   | N: 31,86904<br>E: 47,45592 |
| 14.           | Female | Amara\ Al-Musharah     | 2 years   | N: 31,86904<br>E: 47,45592 |
| 15.           | Male   | Amara\ Al-Musharah     | 1 year    | N: 31,86904<br>E: 47,45592 |
| 16.           | Female | Amara\ Al-Musharah     | 10 years  | N: 31,86904<br>E: 47,45592 |

|     |        |                    |          |                            |
|-----|--------|--------------------|----------|----------------------------|
| 17. | Female | Amara\ Al-Musharah | 1 year   | N: 31,86904<br>E: 47,45592 |
| 18. | Female | Amara\ Al-Musharah | 7 years  | N: 31,86904<br>E: 47,45592 |
| 19. | Male   | Amara\ Al-Musharah | 1 year   | N: 31,86904<br>E: 47,45592 |
| 20. | Female | Amara\ Al-Musharah | 7 years  | N: 31,86904<br>E: 47,45592 |
| 21. | Female | Amara\ Al-Musharah | 2 years  | N: 31,86904<br>E: 47,45592 |
| 22. | Male   | Amara\ Al-Musharah | 1 year   | N: 31,86904<br>E: 47,45592 |
| 23. | Female | Amara\ Al-Musharah | 7 days   | N: 31,91181<br>E: 47,47033 |
| 24. | Female | Amara\ Al-Musharah | 15 days  | N: 31,91181<br>E: 47,47033 |
| 25. | Female | Amara\ Al-Musharah | 15 years | N: 31,91181<br>E: 47,47033 |
| 26. | Female | Amara\ Al-Musharah | 5 years  | N: 31,91181<br>E: 47,47033 |
| 27. | Female | Amara\ Al-Musharah | 4 years  | N: 31,91181<br>E: 47,47033 |
| 28. | Female | Amara\ Al-Musharah | 4 years  | N: 31,91181<br>E: 47,47033 |
| 29. | Female | Amara\ Al-Musharah | 10 years | N: 31,91181<br>E: 47,47033 |
| 30. | Female | Amara\ Al-Musharah | 8 years  | N: 31,91181<br>E: 47,47033 |
| 31. | Female | Amara\ Al-Musharah | 1,5 year | N: 31,91181<br>E: 47,47033 |
| 32. | Male   | Amara\ Al-Musharah | 1,5 year | N: 31,91181<br>E: 47,47033 |
| 33. | Female | Amara\ Al-Musharah | 1 year   | N: 31,91181<br>E: 47,47033 |

|     |        |                    |          |                            |
|-----|--------|--------------------|----------|----------------------------|
| 34. | Female | Amara\ Al-Musharah | 1 year   | N: 31,91181<br>E: 47,47033 |
| 35. | Male   | Amara\ Al-Musharah | 1,5 year | N: 31,91181<br>E: 47,47033 |

**Supplementary Table S2b:** Gender of each sample within Rustaqi breed, location of population, date of collection, age and GPS information.

| No. of samples | Gender | Location of population | Age                 | GPS                        |
|----------------|--------|------------------------|---------------------|----------------------------|
| 1.             | Female | Baghdad- Al-Taji       | 6 years             | N\33,3718<br>E\44,19890    |
| 2.             | Female | Baghdad- Al-Taji       | 15 years            | N\33,3718<br>E\44,19890    |
| 3.             | Female | Baghdad- Al-Taji       | 5 years             | N\33,3718<br>E\44,19890    |
| 4.             | Female | Baghdad- Al-Shuaala    | 7 years             | N\ 33.30718<br>E\ 44.19890 |
| 5.             | Male   | Baghdad- Al-Shuaala    | 6 months            | N\ 33.30718<br>E\ 44.19890 |
| 6.             | Female | Baghdad- Abou Graib    | 5years and 6 months | N\33,36481<br>E\044,24476  |
| 7.             | Female | Baghdad- Abou Graib    | 6 months            | N\33,36481<br>E\044,24476  |
| 8.             | Female | Baghdad- Abou Graib    | 4 years             | N\33,36481<br>E\044,24476  |
| 9.             | Male   | Baghdad- Abou Graib    | 11 months           | N\33,36481<br>E\044,24476  |
| 10.            | Female | Baghdad- Abou Graib    | 5 years             | N\33,36481<br>E\44,24476   |
| 11.            | Female | Baghdad -Al-Fudailia   | 11 months           | N\33.33145<br>E\44.52449   |
| 12.            | Female | Baghdad -Al-Fudailia   | 1 year              | N\33.33145<br>E\44.52449   |
| 13.            | Female | Baghdad -Al-Fudailia   | 1 year and 6 months | N\33.33145<br>E\44.52449   |
| 14.            | Female | Baghdad -Al-Fudailia   | 1 year and 2 months | N\33.33145<br>E\44.52449   |
| 15.            | Female | Baghdad -Al-Fudailia   | 2 years             | N\33.33145<br>E\44.52449   |
| 16.            | Female | Baghdad- Al-Maamil     | 5 years             | N\33.33148<br>E\44.52449   |

|     |        |                                      |                      |                          |
|-----|--------|--------------------------------------|----------------------|--------------------------|
| 17. | Female | Baghdad- Al-Maamil                   | 4 years              | N\33.33148<br>E\44.52449 |
| 18. | Female | Baghdad- Al-Maamil                   | 2 years              | N\33.33148<br>E\44.52449 |
| 19. | Female | Baghdad- Al-Maamil                   | 6 years              | N\33.33148<br>E\44.52449 |
| 20. | Female | Baghdad- Al-Maamil                   | 3 months             | N\33.33148<br>E\44.52449 |
| 21. | Female | Babylon-Al-Sada-<br>Alnasria village | 5 years              | N\32.32807<br>E\44.52311 |
| 22. | Female | Babylon-Al-Sada-<br>Alnasria village | 6years and 6 months  | N\32.32807<br>E\44.52311 |
| 23. | Male   | Babylon-Al-Sada-<br>Alnasria village | 9 months             | N\32.42303<br>E\44.18541 |
| 24. | Female | Babylon-Al-Sada-<br>Alnasria village | 3 years and 6 months | N\32.42303<br>E\44.18541 |
| 25. | Female | Babylon-Al-Sada-<br>Alnasria village | 2 years and 6 months | N\32.32807<br>E\44.52311 |
| 26. | Female | Babylon-Al-Sada-<br>Alnasria village | 5 years and 6 months | N\32.42303<br>E\44.18541 |
| 27. | Female | Babylon-Al-Sada-<br>Alnasria village | 1year and 6 months   | N\32.32807<br>E\44.52311 |
| 28. | Female | Babylon-Nile- Taba<br>village        | 2 years              | N\32.32807<br>E\44.52312 |
| 29. | Female | Babylon-Nile – Taba<br>village       | 1 year               | N\32.48276<br>E\44.56210 |
| 30. | Male   | Babylon-Nile – Taba<br>village       | 2 years              | N\32.48276<br>E\44.56210 |
| 31. | Female | Babylon-Nile – Taba<br>village       | 5 years and 6 months | N\32.48276<br>E\44.56210 |
| 32. | Male   | Babylon- Nile – Taba<br>village      | 2 years              | N\32.48276<br>E\44.56210 |
| 33. | Male   | Babylon- Nile – Taba<br>village      | 2 years              | N\32.48276<br>E\44.56210 |
| 34. | Male   | Babylon- Nile – Taba<br>village      | 2 years              | N\32.48276<br>E\44.56210 |

|     |        |                                          |                      |                          |
|-----|--------|------------------------------------------|----------------------|--------------------------|
| 35. | Male   | Babylon- Nile – Taba village             | 2 years and 6 months | N\32.48276<br>E\44.56210 |
| 36. | Male   | Babylon- Nile – Taba village             | 2 years              | N\32.48276<br>E\44.56210 |
| 37. | Male   | Babylon- Nile – Taba village             | 2 years and 6 months | N\32.48276<br>E\44.56210 |
| 38. | Male   | Babylon- Nile – Taba village             | 2 years and 6 months | N\32.48276<br>E\44.56210 |
| 39. | Female | Babylon- Nile – Taba village             | 3 years and 6 months | N\32.48276<br>E\44.56210 |
| 40. | Female | Babylon- Al-Hamza-<br>Al-Basheia village | 4 years              | N\32.4370<br>E\44.4120   |
| 41. | Female | Babylon- Al-Hamza-<br>Al-Basheia village | 4 years              | N\32.4370<br>E\44.4120   |
| 42. | Female | Babylon- Al-Hamza-<br>Al-Basheia village | 6 years and 6 months | N\32.4370<br>E\44.4120   |
| 43. | Female | Babylon- Al-Hamza-<br>Al-Basheia village | 10 years             | N\32.4370<br>E\44.4120   |
| 44. | Male   | Babylon- Al-Hamza-<br>Al-Basheia village | 2 years              | N\32.4370<br>E\44.4120   |
| 45. | Male   | Babylon- Al-Hamza-<br>Al-Basheia village | 10 months            | N\32.4370<br>E\44.4120   |
| 46. | Female | Babylon- Al-Hamza-<br>Al-Basheia village | 10 years             | N\32.4370<br>E\44.4120   |
| 47. | Female | Babylon- Al-Hamza-<br>Al-Basheia village | 5 years and 6 months | N\32.4370<br>E\44.4120   |
| 48. | Female | Babylon- Al-Hamza-<br>Al-Basheia village | 5 years              | N\32.4370<br>E\44.4120   |
| 49. | Male   | Babylon- Al-Hamza-<br>Al-Basheia village | 2 years              | N\32.4370<br>E\44.4120   |
| 50. | Female | Babylon-Alqasim-<br>Alnakabia village    | 5 years              | N\32.1252<br>E\44.3928   |
| 51. | Female | Babylon-Al-Qasim-<br>Al-Nakabia village  | 4 years              | N\32.1307<br>E\44.3947   |
| 52. | Female | Babylon-Al-Qasim-<br>Al-Nakabia village  | 8 years              | N\32.1252<br>E\44.3928   |

|     |        |                                     |                      |                        |
|-----|--------|-------------------------------------|----------------------|------------------------|
| 53. | Female | Babylon-Al-Qasim-Al-Nakabia village | 5 years and 6 months | N\32.1307<br>E\44.3947 |
| 54. | Female | Babylon-Al-Qasim-Al-Nakabia village | 3 years              | N\32.1307<br>E\44.3947 |
| 55. | Female | Babylon-Al-Qasim-Al-Nakabia village | 5 years              | N\32.1252<br>E\44.3928 |
| 56. | Female | Babylon-Al-Qasim-Al-Nakabia village | 5 years              | N\32.1252<br>E\44.3928 |
| 57. | Male   | Babylon-Al-Qasim-Al-Nakabia village | 2 years and 6 months | N\32.1307<br>E\44.3947 |
| 58. | Male   | Babylon-Al-Qasim-Al-Nakabia village | 3 years              | N\32.1252<br>E\44.3928 |
| 59. | Male   | Babylon-Al-Qasim-Al-Nakabia village | 2 years and 6 months | N\32.1307<br>E\44.3947 |
| 60. | Male   | Babylon-Al-Qasim-Al-Nakabia village | 2 years              | N\32.1252<br>E\44.3928 |
