# Supplementary material for: Genome Analysis Reveals Genetic Admixture and Signature of Selection for Productivity and Environmental Traits in Iraqi Cattle
Source: PubMed Central journal article supplement (PMC6646475; doi:10.3389/fgene.2019.00609), 2019-07-16
Supplement: Table_3.pdf [file Table_3.pdf]

**Supplementary Table S3: Comparison of diversity levels among Iraqi\_ Iranian cattle.**

[Number of animals, mean of expected heterozygosity (*He*), observed heterozygosity (*Ho*) and minor allele frequency (*MAF*)]

| <b>Breed</b>                              | <b>n</b> | <b>Genotype</b> | <b><i>He</i> (Mean)</b> | <b><i>Ho</i> (Mean)</b> | <b><i>MAF</i> (Mean)</b> |
|-------------------------------------------|----------|-----------------|-------------------------|-------------------------|--------------------------|
| <b>Jenoubi</b> (Iraqi zebu)               | 35       | HD              | 0.32                    | 0.32                    | 0.24                     |
| <b>Rustaqi</b> (Iraqi taurine)            | 59       | HD              | 0.37                    | 0.36                    | 0.28                     |
| Sarabi (Iranian Breed)                    | 19       | HD              | 0.34                    | -                       | 0.25                     |
| Kurdi (Iranian Breed)                     | 7        | HD              | 0.36                    | -                       | 0.26                     |
| Taleshi (Iranian Breed)                   | 7        | HD              | 0.32                    | -                       | 0.23                     |
| Pars (Iranian Breed)                      | 7        | HD              | 0.26                    | -                       | 0.21                     |
| Sistani (Iranian Breed)                   | 9        | HD              | 0.23                    | -                       | 0.23                     |
| Najdi (Iranian Breed)                     | 7        | HD              | 0.31                    | -                       | 0.31                     |
| Kermani (Iranian Breed)                   | 9        | HD              | 0.27                    | -                       | 0.20                     |
| Mazandarani (Iranian Breed)               | 10       | HD              | 0.32                    |                         | 0.23                     |
| Holstein-Friesian (Bos taurus)            | 30       | HD              | 0.31                    | 0.31                    | 0.23                     |
| Nellore (Bos indicus)                     | 35       | HD              | 0.22                    | 0.23                    | 0.16                     |
| N'Dama Guinea (Bos taurus)                | 24       | HD              | 0.23                    | 0.23                    | 0.17                     |
| Sheko (Ethiopian_ Bos taurus)             | 18       | HD              | 0.36                    | 0.37                    | 0.27                     |
| Sanga cattle_South Africa (Africana)      | 42       | LD              | 0.24                    | -                       | -                        |
| Sanga cattle_South Africa (Nguni)         | 54       | LD              | 0.28                    | -                       | -                        |
| Sanga cattle_South Africa (Drakensberger) | 47       | LD              | 0.30                    | -                       | -                        |
