# Supplementary material for: Genome Analysis Reveals Genetic Admixture and Signature of Selection for Productivity and Environmental Traits in Iraqi Cattle
Source: PubMed Central journal article supplement (PMC6646475; doi:10.3389/fgene.2019.00609), 2019-07-16
Supplement: Table_6.pdf [file Table_6.pdf]

**Supplementary Table S6:** Candidate gene regions with their functions detected by *iHS* and *Rsb* in Iraqi breeds (Rustaqi and Jenoubi)

| Chromosome | Candidate gene regions |           |        | <i>iHS</i> = 4 /- 4<br>( threshold ) |                | <i>Rsb</i> = 5 /- 5<br>( threshold ) |                | Gene ID          | Trait association / QTL information<br>(Biological role)                                                               | Studies                                                                                               |
|------------|------------------------|-----------|--------|--------------------------------------|----------------|--------------------------------------|----------------|------------------|------------------------------------------------------------------------------------------------------------------------|-------------------------------------------------------------------------------------------------------|
|            | Start                  | End       | Mb     | <i>Rustaqi</i>                       | <i>Jenoubi</i> | <i>Rustaqi</i>                       | <i>Jenoubi</i> |                  |                                                                                                                        |                                                                                                       |
| 1          | 56722581               | 56818961  | 96380  | N                                    | N              | Y                                    | N              | <i>CD96-201</i>  | Immunological related<br>MHC-class1 gene                                                                               | (Al Naib <i>et al.</i> ,<br>2011)<br>(Wu <i>et al.</i> , 2014)                                        |
| 1          | 14791090               | 15026555  | 235465 | N                                    | Y              | N                                    | Y              | <i>NCAM2</i>     | Healthy related<br>Fat, protein and milk yield. Marbling score of meat.<br>Neurogenesis role (olfactory receptor gene) | (Venturini <i>et al.</i> ,<br>2014)<br>(Seong <i>et al.</i> ,<br>2016)<br>(Shin <i>et al.</i> , 2014) |
| 1          | 18058709               | 18207251  | 148542 | N                                    | Y              | N                                    | Y              | <i>TMPRSS15</i>  | Healthy related<br>Fat, protein and milk yield.                                                                        | (Venturini <i>et al.</i> ,<br>2014)                                                                   |
| 1          | 18208866               | 18233154  | 24288  | N                                    | Y              | N                                    | N              | <i>CHODL</i>     | Healthy related<br>Endocytosis of glycoproteins and exogenous sugar-bearing<br>pathogens                               | Gene card                                                                                             |
| 1          | 107241227              | 107576086 | 334859 | Y                                    | N              | N                                    | N              | <i>PPMIL</i>     | Immunological and health related tumour-suppressive and<br>regulate endoplasmic reticulum ER stress                    | ( Flisikowski <i>et al.</i> , 2015)<br>(Ren <i>et al.</i> , 2014)                                     |
| 1          | 141349995              | 141401851 | 51856  | Y                                    | N              | N                                    | N              | <i>IGSF5</i>     | Immunological related<br>Regulation of leukocytes and immunoglobulins                                                  | (Jeong <i>et al.</i> ,<br>2015)                                                                       |
| 3          | 103353700              | 103422206 | 68506  | Y                                    | N              | N                                    | N              | <i>CFAP57</i>    | Healthy related<br>Formation of protein-protein complexes                                                              | Gene card                                                                                             |
| 5          | 43746464               | 43872342  | 125878 | N                                    | N              | Y                                    | N              | <i>MYRFL-201</i> | Healthy related<br>Maintain a mature myelinated central nervous system in mice                                         | (Koenning ,<br>2015)                                                                                  |
| 5          | 33189704               | 33339728  | 150024 | Y                                    | N              | N                                    | N              | <i>PCED1B</i>    | Healthy related<br>Modification of biopolymers on the cell surface                                                     | Gene card                                                                                             |

| Chromosome | Candidate gene regions |          |        | <i>iHS</i> = 4 /- 4<br>( threshold ) |                | <i>Rsb</i> = 5 /- 5<br>( threshold ) |                | Gene ID        | Trait association / QTL information<br>(Biological role)                                                                 | Studies                                                         |
|------------|------------------------|----------|--------|--------------------------------------|----------------|--------------------------------------|----------------|----------------|--------------------------------------------------------------------------------------------------------------------------|-----------------------------------------------------------------|
|            | Start                  | End      | Mb     | <i>Rustaqi</i>                       | <i>Jenoubi</i> | <i>Rustaqi</i>                       | <i>Jenoubi</i> |                |                                                                                                                          |                                                                 |
| 5          | 42837597               | 43112731 | 275134 | Y                                    | N              | N                                    | N              | <i>PTPRR</i>   | Healthy related<br>Regulate a variety of cellular processes. Neuron activity promotion                                   | (Allan <i>et al.</i> , 2009)<br>(Hendriks <i>et al.</i> , 2009) |
| 5          | 91835146               | 92276939 | 441793 | Y                                    | N              | N                                    | N              | <i>PIK3C2G</i> | Healthy related<br>Growth factor. Associated with nervous transmission                                                   | (Flori <i>et al.</i> , 2009)<br>(Shin <i>et al.</i> , 2014)     |
| 6          | 82560093               | 82962887 | 402794 | N                                    | Y              | N                                    | N              | <i>EPHA5</i>   | Healthy related<br>Behaviour regulated in mice<br>Regulation of insulin secretion. Feed conversion ratio (FCR) in cattle | (Mamiya <i>et al.</i> , 2008)<br>(Santana <i>et al.</i> , 2016) |
| 6          | 88182303               | 88541046 | 358743 | N                                    | Y              | N                                    | Y              | <i>SLC4A4</i>  | Healthy related<br>Rumen development and milk Production                                                                 | (Li <i>et al.</i> , 2010)<br>(Connor <i>et al.</i> , 2013)      |
| 6          | 88695940               | 88739180 | 43240  | N                                    | Y              | N                                    | Y              | <i>GC</i>      | Healthy related<br>Udder structure, height and cleft                                                                     | QTL                                                             |
| 6          | 90842934               | 90985937 | 143003 | N                                    | Y              | N                                    | N              | <i>MTHFD2L</i> | Healthy related<br>Calving interval in dairy cattle. Metabolism of water-soluble vitamins                                | (Raven <i>et al.</i> , 2016)<br>Gene card                       |
| 6          | 86169557               | 86190786 | 21229  | N                                    | N              | N                                    | Y              | <i>Novel</i>   | -                                                                                                                        | -                                                               |

| Chromosome | Candidate gene regions |          |        | <i>iHS</i> = 4 /- 4<br>( threshold ) |                | <i>Rsb</i> = 5 /- 5<br>( threshold ) |                | Gene ID        | Trait association / QTL information<br>(Biological role)                                                                                  | Studies                                                                                                                           |
|------------|------------------------|----------|--------|--------------------------------------|----------------|--------------------------------------|----------------|----------------|-------------------------------------------------------------------------------------------------------------------------------------------|-----------------------------------------------------------------------------------------------------------------------------------|
|            | Start                  | End      | Mb     | <i>Rustaqi</i>                       | <i>Jenoubi</i> | <i>Rustaqi</i>                       | <i>Jenoubi</i> |                |                                                                                                                                           |                                                                                                                                   |
| 6          | 87035926               | 87094952 | 59026  | N                                    | N              | N                                    | Y              | <i>SULT1E1</i> | Healthy related<br>Regulates active oestrogen.<br>Oestrogen metabolic process and regulation of fat cell differentiation.Lipid metabolism | (Ushizawa <i>et al.</i> , 2007)<br>(McCabe <i>et al.</i> , 2012)<br>(Khatri <i>et al.</i> , 2011)<br>(Seong <i>et al.</i> , 2016) |
| 6          | 87179502               | 87188025 | 8523   | N                                    | N              | N                                    | Y              | <i>CSN2</i>    | Healthy related<br>Milk protein production and quality                                                                                    | (Ogorevc <i>et al.</i> , 2009)<br>(Rothammer <i>et al.</i> , 2013)<br>(Taye <i>et al.</i> , 2017)                                 |
| 6          | 87694412               | 87705727 | 11315  | N                                    | N              | N                                    | Y              | <i>AMBN</i>    | Healthy related<br>Role in differentiation of inner enamel epithelium.Biomineral tissue developemnt                                       | (Perdigao <i>et al.</i> , 2004)<br>(Do <i>et al.</i> , 2017)                                                                      |
| 6          | 89162542               | 89460195 | 297653 | N                                    | N              | N                                    | Y              | <i>ADAMTS3</i> | Healthy related<br>Fertility trait. Implicated in the processes of luteinization and ovulation process. Udder conformation traits         | (Mészáros <i>et al.</i> , 2014)<br>(Pausch <i>et al.</i> , 2014)<br>(Barthelemy <i>et al.</i> , 2018)                             |

| Chromosome | Candidate gene regions |          |        | <i>iHS</i> = 4 /- 4<br>( threshold ) |                | <i>Rsb</i> = 5 /- 5<br>( threshold ) |                | Gene ID        | Trait association / QTL information<br>(Biological role)                                                                                                                                 | Studies                                                                             |
|------------|------------------------|----------|--------|--------------------------------------|----------------|--------------------------------------|----------------|----------------|------------------------------------------------------------------------------------------------------------------------------------------------------------------------------------------|-------------------------------------------------------------------------------------|
|            | Start                  | End      | Mb     | <i>Rustaqi</i>                       | <i>Jenoubi</i> | <i>Rustaqi</i>                       | <i>Jenoubi</i> |                |                                                                                                                                                                                          |                                                                                     |
| 6          | 91597122               | 91723390 | 126268 | N                                    | N              | N                                    | Y              | <i>PARM1</i>   | Immunological and healthy related<br>Anti-apoptotic. Daughter pregnancy rate (DPR), heifer conception rate, cow conception rate, productive life, net merit, milk, protein and fat yield | (Cochran, 2013)<br>(Hallé, 2015)<br>(Ortega <i>et al.</i> , 2016)                   |
| 7          | 71003540               | 71115619 | 112079 | N                                    | N              | N                                    | Y              | <i>CYFIP2</i>  | Healthy related<br>Regulation of actin cytoskeleton                                                                                                                                      | Gene card                                                                           |
| 7          | 73928475               | 73960160 | 31685  | N                                    | N              | N                                    | Y              | <i>CCNJL</i>   | -                                                                                                                                                                                        | -                                                                                   |
| 7          | 35812577               | 35858617 | 46040  | N                                    | Y              | N                                    | N              | <i>TNFAIP8</i> | Immunological and health related<br>Tumour-suppressive and oocytes growth.                                                                                                               | (Hadisaputri <i>et al.</i> , 2012)<br>(Zhang, 2012)<br>(Iwata <i>et al.</i> , 2016) |
| 7          | 69585066               | 70027839 | 442773 | N                                    | Y              | N                                    | N              | <i>SGCD</i>    | Healthy related<br>Cardiac and skeletal muscles mass. Improve energy level in the body                                                                                                   | (Bradley <i>et al.</i> , 2008)<br>(Martchenko <i>et al.</i> , 2018)                 |
| 7          | 12206055               | 12266930 | 60875  | Y                                    | N              | N                                    | N              | <i>ADGRE3</i>  | Immunological and health related<br>Play a role in myeloid-myeloid interactions during immune and inflammatory responses.                                                                | Gene card                                                                           |
| 8          | 23386997               | 23662561 | 275564 | N                                    | Y              | N                                    | Y              | <i>FOCAD</i>   | Immunological related<br>Tumour-suppressive                                                                                                                                              | Gene card                                                                           |
| 10         | 44711724               | 44842190 | 130466 | Y                                    | N              | N                                    | N              | <i>GNG2</i>    | Healthy related<br>Involved in signaling mechanisms across membranes.                                                                                                                    | Gene card                                                                           |

| Chromosome | Candidate gene regions |          |        | <i>iHS</i> = 4 /- 4<br>( threshold ) |                | <i>Rsb</i> = 5 /- 5<br>( threshold ) |                | Gene ID                        | Trait association / QTL information<br>(Biological role)                                                                                                                                                                                                                                                                                                    | Studies                                                                                                                                                                               |
|------------|------------------------|----------|--------|--------------------------------------|----------------|--------------------------------------|----------------|--------------------------------|-------------------------------------------------------------------------------------------------------------------------------------------------------------------------------------------------------------------------------------------------------------------------------------------------------------------------------------------------------------|---------------------------------------------------------------------------------------------------------------------------------------------------------------------------------------|
|            | Start                  | End      | Mb     | <i>Rustaqi</i>                       | <i>Jenoubi</i> | <i>Rustaqi</i>                       | <i>Jenoubi</i> |                                |                                                                                                                                                                                                                                                                                                                                                             |                                                                                                                                                                                       |
| 10         | 48949618               | 49750993 | 801375 | Y                                    | N              | N                                    | N              | <i>RARA</i><br>( <i>RORA</i> ) | Immunological and health related<br>Cell-mediated immune response in case of mastitis (CD4 (+)/<br>T-helper cells mechanisms). Intramuscular fat deposition and<br>composition. Plays an important role in the regulation of lipid<br>homeostasis and the promotion of myogenesis in skeletal<br>muscle. Steroid hormone receptor activity.Fertility trait. | (Ogorevc <i>et al.</i> ,<br>2009)<br>(Sevane <i>et al.</i> ,<br>2014)<br>(Qanbari <i>et al.</i> ,<br>2010)<br>(Bahbahani <i>et al.</i> ,<br>2017)<br>(Pandey <i>et al.</i> ,<br>2017) |
| 10         | 51020033               | 51240077 | 220044 | Y                                    | N              | N                                    | N              | <i>MYO1E</i>                   | Healthy related<br>Actin-based molecular motors, intracellular movement and<br>membrane trafficking.                                                                                                                                                                                                                                                        | Gene card                                                                                                                                                                             |
| 11         | 38706659               | 38928773 | 222114 | Y                                    | N              | N                                    | N              | <i>CCDC85A</i>                 | -                                                                                                                                                                                                                                                                                                                                                           | -                                                                                                                                                                                     |
| 13         | 36610252               | 36833259 | 223007 | Y                                    | N              | N                                    | N              | <i>MPP7</i>                    | -                                                                                                                                                                                                                                                                                                                                                           | -                                                                                                                                                                                     |
| 13         | 39202450               | 39632869 | 430419 | Y                                    | N              | N                                    | N              | <i>SLC24A3</i>                 | Healthy related<br>Fertility trait                                                                                                                                                                                                                                                                                                                          | (Moran <i>et al.</i> ,<br>2017)                                                                                                                                                       |
| 13         | 43605579               | 43610260 | 4681   | Y                                    | N              | N                                    | N              | <i>UCN3</i>                    | Healthy related<br>Response to heat stress                                                                                                                                                                                                                                                                                                                  | (Zheng <i>et al.</i> ,<br>2014)                                                                                                                                                       |
| 16         | 30656001               | 30703396 | 47395  | Y                                    | N              | N                                    | N              | <i>COQ8A</i>                   | Healthy related<br>Lack of this gene led to ataxia in mammals                                                                                                                                                                                                                                                                                               | (Stefely <i>et al.</i> ,<br>2016)                                                                                                                                                     |
| 16         | 32381118               | 32471604 | 90486  | Y                                    | N              | N                                    | N              | <i>KIF26B</i>                  | Immunological and Healthy related<br>Platelets activation and embryonic kidney development                                                                                                                                                                                                                                                                  | Gene card                                                                                                                                                                             |

| Chromosome | Candidate gene regions |            |        | <i>iHS</i> = 4 /- 4<br>( threshold ) |                | <i>Rsb</i> = 5 /- 5<br>( threshold ) |                | Gene ID                           | Trait association / QTL information<br>(Biological role)                                                                                                                                | Studies                                                                             |
|------------|------------------------|------------|--------|--------------------------------------|----------------|--------------------------------------|----------------|-----------------------------------|-----------------------------------------------------------------------------------------------------------------------------------------------------------------------------------------|-------------------------------------------------------------------------------------|
|            | <i>Start</i>           | <i>End</i> | Mb     | <i>Rustaqi</i>                       | <i>Jenoubi</i> | <i>Rustaqi</i>                       | <i>Jenoubi</i> |                                   |                                                                                                                                                                                         |                                                                                     |
| 16         | 45621457               | 45879645   | 258188 | Y                                    | N              | N                                    | N              | <i>RERE</i>                       | Healthy related<br>Embryonic growth and reproductive development                                                                                                                        | (Randhawa <i>et al.</i> ,<br>2016)<br>(Edea <i>et al.</i> ,<br>2018)                |
| 17         | 52565556               | 52785519   | 219963 | N                                    | N              | N                                    | Y              | <i>TMEM132B</i>                   | Healthy related<br>control for potential compensatory mechanisms in the brain of mice                                                                                                   | (Walser <i>et al.</i> ,<br>2012)                                                    |
| 18         | 8427455                | 8516798    | 89343  | Y                                    | N              | N                                    | N              | <i>PLCG2</i>                      | Healthy related<br>Prolactin signalling                                                                                                                                                 | (Ponsuksili <i>et al.</i> ,<br>2012)                                                |
| 18         | 9512739                | 10162782   | 650043 | Y                                    | N              | N                                    | N              | <i>CDH13</i>                      | Healthy related<br>Chest width, Dry matter intake, Residual feed intake                                                                                                                 | QTL                                                                                 |
| 18         | 10250180               | 10263073   | 12893  | Y                                    | N              | N                                    | N              | <i>NOVEL</i>                      | -                                                                                                                                                                                       | -                                                                                   |
| 18         | 10294996               | 10305608   | 10612  | Y                                    | N              | N                                    | N              | <i>OSGIN1</i>                     | Immunological and Healthy related<br>Oxidative stress response protein that regulates cell death in mammary tissue. Key regulator of both inflammatory and anti-inflammatory molecules. | (Gilbert <i>et al.</i> ,<br>2012)<br>(Osińska <i>et al.</i> ,<br>2014)<br>Gene card |
| 18         | 10694237               | 10706275   | 12038  | Y                                    | N              | N                                    | N              | <i>TLDC1</i><br>- <i>Kiaa1609</i> | Healthy related<br>Neuroprotective against oxidative stress                                                                                                                             | (Finelli <i>et al.</i> ,<br>2016)                                                   |
| 18         | 10985132               | 11050904   | 65772  | Y                                    | N              | N                                    | N              | <i>CRISPLD2</i>                   | Immunological related<br>Regulate Endotoxin Function<br>(anti-inflammatory function)                                                                                                    | (Cheng <i>et al.</i> ,<br>2015)<br>(Wang <i>et al.</i> ,<br>2009)                   |

| Chromosome | Candidate gene regions |          |       | <i>iHS</i> = 4 /- 4<br>( threshold ) |                | <i>Rsb</i> = 5 /- 5<br>( threshold ) |                | Gene ID                        | Trait association / QTL information<br>(Biological role)                                                                                                                                                                                                                                       | Studies                                                                              |
|------------|------------------------|----------|-------|--------------------------------------|----------------|--------------------------------------|----------------|--------------------------------|------------------------------------------------------------------------------------------------------------------------------------------------------------------------------------------------------------------------------------------------------------------------------------------------|--------------------------------------------------------------------------------------|
|            | Start                  | End      | Mb    | <i>Rustaqi</i>                       | <i>Jenoubi</i> | <i>Rustaqi</i>                       | <i>Jenoubi</i> |                                |                                                                                                                                                                                                                                                                                                |                                                                                      |
| 18         | 11883376               | 11905043 | 21667 | Y                                    | N              | N                                    | N              | <i>IRF8</i>                    | Immunological related<br>Defence response to bacterium, defence response to protozoan, main activity in proliferation and differentiation of immune cells, lacking this genes led to susceptible to Salmonella and Mycobacterial infection, plays an important role for pre-B-cell development | Gautier <i>et al.</i> , 2009)<br>(Porto-Neto <i>et al.</i> , 2013)<br>( Giagu, 2016) |
| 18         | 13186023               | 13260798 | 74775 | Y                                    | N              | N                                    | N              | <i>JPH3</i>                    | Healthy related<br>Cell surface and intracellular ion mechanism. Skeletal and Muscular System Development and Function in cattle. Meat quality trait ( intramuscular fatty acid deposition, and muscle fiber in pigs )                                                                         | Gene card<br>(Barbisin <i>et al.</i> , 2014)<br>(Jeong <i>et al.</i> , 2015)         |
| 18         | 13268589               | 13299788 | 31199 | Y                                    | N              | N                                    | N              | <i>KLHDC4</i>                  | Healthy related<br>Residual feed intake (RFI). Regulate Conjugated linoleic acid (CLA) in early lactating in cattle liver                                                                                                                                                                      | (Garbe, 2015)<br>(Ringseis <i>et al.</i> , 2016)                                     |
| 18         | 13341371               | 13370494 | 29123 | Y                                    | N              | N                                    | N              | <i>SLC7A5</i>                  | Immunological and Healthy related<br>Glucose Metabolism and Blood-Brain Barrier and Immune Cell Transmigration. Also, embryonic development and reproductive functions. Dairy traits                                                                                                           | Gene card<br>(Gautier <i>et al.</i> , 2011)<br>(Joost <i>et al.</i> , 2015)          |
| 18         | 13389828               | 13412237 | 22409 | Y                                    | N              | N                                    | N              | <i>CAER5A</i>                  | -                                                                                                                                                                                                                                                                                              | -                                                                                    |
| 18         | 13425303               | 13493366 | 68063 | Y                                    | N              | N                                    | N              | <i>BANP</i><br>( <i>BTG3</i> ) | Immunological related<br>T-cell development. Tumour suppressor. Important for fetal muscle growth.                                                                                                                                                                                             | Gene card<br>(Feng <i>et al.</i> , 2007)                                             |

| Chromosome | Candidate gene regions |          |        | <i>iHS</i> = 4 /- 4<br>( threshold ) |                | <i>Rsb</i> = 5 /- 5<br>( threshold ) |                | Gene ID        | Trait association / QTL information<br>(Biological role)                                                                                                                   | Studies                                                         |
|------------|------------------------|----------|--------|--------------------------------------|----------------|--------------------------------------|----------------|----------------|----------------------------------------------------------------------------------------------------------------------------------------------------------------------------|-----------------------------------------------------------------|
|            | Start                  | End      | Mb     | <i>Rustaqi</i>                       | <i>Jenoubi</i> | <i>Rustaqi</i>                       | <i>Jenoubi</i> |                |                                                                                                                                                                            |                                                                 |
| 18         | 14061951               | 14077096 | 15145  | Y                                    | N              | N                                    | N              | <i>GALNS</i>   | Healthy related<br>Effects on Tissues rich in keratan sulfate including cartilage, cornea and heart valve.                                                                 | Gene card                                                       |
| 18         | 14096667               | 14174040 | 77373  | Y                                    | N              | N                                    | N              | <i>CBFA2T3</i> | Immunological related<br>Associated with cellular proliferation, lipid metabolism, and innate immunity in dairy cow mammary gland tissue at different stages of lactation. | (Wang <i>et al.</i> , 2012)                                     |
| 18         | 16551061               | 16610345 | 59284  | Y                                    | N              | N                                    | N              | <i>ABCC12</i>  | Healthy related<br>Muscle Mass trait                                                                                                                                       | (Kärst <i>et al.</i> , 2011)                                    |
| 18         | 18041277               | 18392207 | 350930 | Y                                    | N              | N                                    | N              | <i>ZNF423</i>  | Healthy related<br>Residual feed intake, dry matter intake (DMI) and skeletal muscles trait (fat)                                                                          | (Abo-Ismael <i>et al.</i> , 2014)<br>(Guo <i>et al.</i> , 2015) |
| 18         | 23861829               | 23927174 | 65345  | Y                                    | N              | N                                    | N              | <i>LPCAT2</i>  | Healthy related<br>Milk, fat, and protein yield.                                                                                                                           | (Venturini <i>et al.</i> , 2014)                                |
| 18         | 39221305               | 39300130 | 78825  | Y                                    | N              | N                                    | N              | <i>PKD1L3</i>  | Healthy related<br>Kidney function                                                                                                                                         | Gene card                                                       |
| 21         | 35415163               | 35655955 | 240792 | N                                    | Y              | N                                    | N              | <i>STXBP6</i>  | Healthy related<br>Meat quality (marbling score).                                                                                                                          | (Ryu <i>et al.</i> , 2014)                                      |
| 22         | 55944219               | 56217921 | 273702 | N                                    | Y              | N                                    | N              | <i>ATG7</i>    | Immunological and Healthy related<br>Autophagy and hematopoietic stem cell maintenance                                                                                     | (Aboelenain <i>et al.</i> , 2015)<br>Gene card                  |
| 22         | 56530332               | 56533155 | 2823   | N                                    | N              | N                                    | Y              | <i>TRH</i>     | Healthy related<br>releases mature thyrotropin-releasing hormone                                                                                                           | Gene card                                                       |
| 24         | 33386429               | 33419545 | 33116  | Y                                    | N              | N                                    | N              | <i>ANKRD29</i> | Healthy related<br>Down regulated for adipocytes (intramuscular fat)                                                                                                       | (Yu <i>et al.</i> , 2009)                                       |

| Chromosome | Candidate gene regions |          |         | <i>iHS</i> = 4 /- 4<br>( threshold ) |                | <i>Rsb</i> = 5 /- 5<br>( threshold ) |                | Gene ID       | Trait association / QTL information<br>(Biological role)                                                                                                                                          | Studies                                                                                                                               |
|------------|------------------------|----------|---------|--------------------------------------|----------------|--------------------------------------|----------------|---------------|---------------------------------------------------------------------------------------------------------------------------------------------------------------------------------------------------|---------------------------------------------------------------------------------------------------------------------------------------|
|            | Start                  | End      | Mb      | <i>Rustaqi</i>                       | <i>Jenoubi</i> | <i>Rustaqi</i>                       | <i>Jenoubi</i> |               |                                                                                                                                                                                                   |                                                                                                                                       |
| 26         | 5017714                | 5578654  | 560940  | N                                    | Y              | N                                    | Y              | <i>PCDH15</i> | Healthy related<br>Maintenance of intestine membrane. Also, it plays an essential role in maintenance of normal retinal and cochlear function.                                                    | Gene card                                                                                                                             |
| 26         | 6906081                | 8343629  | 1437548 | Y                                    | Y              | N                                    | Y              | <i>PRKG1</i>  | Immunological and Healthy related<br>Associated with tick resistance. Milk fatty acid traits, Daughter pregnancy rate and udder structure (height, cleft, and attachment, Teat placement)         | (Mapholi <i>et al.</i> , 2016)<br>(Vajana <i>et al.</i> , 2018)<br>QTL<br>(Li <i>et al.</i> , 2014)<br>(Gautier <i>et al.</i> , 2006) |
| 26         | 20694707               | 20777487 | 82780   | Y                                    | N              | Y                                    | N              | <i>DNMBP</i>  | Healthy related<br>Milk-fat composition trait                                                                                                                                                     | (Buitenhuis <i>et al.</i> , 2014)                                                                                                     |
| 26         | 20206332               | 20276715 | 70383   | Y                                    | N              | N                                    | N              | <i>CNNM1</i>  | Healthy related<br>Functions as a copper storage protein in neuronal cells                                                                                                                        | (Chandran <i>et al.</i> , 2016)                                                                                                       |
| 26         | 20494069               | 20524328 | 30259   | Y                                    | N              | N                                    | N              | <i>ENTPD7</i> | Immunological and Healthy related<br>Role in hepatic purinergic signalling gene network expression and its relationship with inflammation and oxidative stress.<br>Starch and sucrose metabolism. | (Seo <i>et al.</i> , 2014)<br>(Kim <i>et al.</i> , 2015)                                                                              |
| 26         | 20613538               | 20684065 | 70527   | Y                                    | N              | N                                    | N              | <i>ABCC2</i>  | Immunological and Healthy related<br>Play a fundamental role in resistance to gastrointestinal nematodes. Also, play role in intestinal, liver drug efflux mechanisms                             | (Li <i>et al.</i> , 2011)<br>(Zancanella <i>et al.</i> , 2013)                                                                        |

| Chromosome | Candidate gene regions |            |       | <i>iHS</i> = 4 /- 4<br>( threshold ) |                | <i>Rsb</i> = 5 /- 5<br>( threshold ) |                | Gene ID        | Trait association / QTL information<br>(Biological role)                  | Studies                                  |
|------------|------------------------|------------|-------|--------------------------------------|----------------|--------------------------------------|----------------|----------------|---------------------------------------------------------------------------|------------------------------------------|
|            | <i>Start</i>           | <i>End</i> | Mb    | <i>Rustaqi</i>                       | <i>Jenoubi</i> | <i>Rustaqi</i>                       | <i>Jenoubi</i> |                |                                                                           |                                          |
| 26         | 21010622               | 21035035   | 24413 | Y                                    | N              | N                                    | N              | <i>CWF19L1</i> | Healthy related<br>Skeletal muscle development and regeneration in cattle | (Moreno-Sánchez<br><i>et al.</i> , 2010) |
| 26         | 21248525               | 21280208   | 31683 | Y                                    | N              | N                                    | N              | <i>SEC31B</i>  | Healthy related<br>Play role in milk fatty acid (FA) trait                | (Buitenhuis <i>et al.</i> ,<br>2014)     |

- **Y: significant result, N: non-significant result.**

## References

Abo-Ismael, K., V ander V oort, G., Squires, J., Swanson, C., Mandell, B., Liao, X., Stothard, P ., Moore, S., Plastow, G. and Miller, P. (2014). Single nucleotide polymorphisms for feed efficiency and performance in crossbred beef cattle. *BMC Genetics*, 15(1), p.1.

Al Naib, A., Mamo, S., O’Gorman, M., Lonergan, P., Swales, A. and Fair, T. (2011). Regulation of non-classical major histocompatibility complex class I mRNA expression in bovine embryos. *Journal of Reproductive Immunology*, 91(1), pp.31-40.

Allan, F., Kuehn, A., Cushman, A., Snelling, M., Echterkamp, E. and Thallman, M. (2009). Confirmation of quantitative trait loci using a low-density single nucleotide polymorphism map for twinning and ovulation rate on bovine chromosome 5. *Journal of Animal Science*, 87(1): 46-56.

Barbisin, M., Vanni, S., Schmädicke, C., Montag, J., Motzkus, D., Opitz, L., Salinas-Riester, G. and Legname, G. (2014). Gene expression profiling of brains from bovine spongiform encephalopathy (BSE)-infected cynomolgus macaques. *BMC Genomics*, 15(1),434. doi:10.1186/1471-2164-15-434.

Barthelemy, A., Sencio, V., Soulard, D., Deruyter, L., Faveeuw, C., Le Goffic, R., and Trottein, F. (2018). Interleukin-22 immunotherapy during severe influenza enhances lung tissue integrity and reduces secondary bacterial systemic invasion. *Infection and immunity*, 86(7), e00706-17 IAI. 00706-17. doi: 10.1128/IAI.00706-17.

Bradley, L., Yaworsky, J. and Walsh, S. (2008). Myostatin as a therapeutic target for musculoskeletal disease. *Cellular and Molecular Life Sciences*, 65(14),2119-2124.

Chandran, U., Indu, S., Kumar, A.T., Devi, N., Khan, I., Srivastava, D. and Kumar, G. (2016). Expression of Cnnm1 and its association with stemness, cell cycle, and differentiation in spermatogenic cells in mouse testis. *Biology of Reproduction*, 95(1):7,1–12. doi 10.1095/biolreprod.115.130369.

Cheng, Z., Oguejiofor, F., Swangchan-Uthai, T., Carr, S. and Wathes, C. (2015). Relationships between Circulating Urea Concentrations and Endometrial Function in Postpartum Dairy Cows. *Animals*, 5(3),748-773.

Do, D. N., Bissonnette, N., Lacasse, P., Miglior, F., Sargolzaei, M., Zhao, X., and Ibeagha-Awemu, E. M. (2017). Genome-wide association analysis and pathways enrichment for lactation persistency in Canadian Holstein cattle. *Journal of dairy science*, 100(3), 1955-1970. doi: 10.3168/jds.2016- 11910.

Edea, Z., Dadi, H., Dessie, T., Uzzaman, M. R., Rothschild, M. F., Kim, E. S., and Kim, K. S. (2018). Genome-wide scan reveals divergent selection among taurine and zebu cattle populations from different regions. *Animal genetics*.9(6), 550-563. doi: 10.1111/age.12724.

Finelli, J., Sanchez-Pulido, L., Liu, X., Davies, E. and Oliver, L. (2016). The evolutionarily conserved Tre2/Bub2/Cdc16 (TBC), Lysin motif (LysM), Domain catalytic (TLDC) domain is neuroprotective against oxidative stress. *Journal of Biological Chemistry*, 291(6),2751-2763.

- Flisikowski, K., Flisikowska, T., Sikorska, A., Perkowska, A., Kind, A., Schnieke, A. and Switonski, M. (2015). Germline gene polymorphisms predisposing domestic mammals to carcinogenesis. *Veterinary and Comparative Oncology*, 15(2), 289-298. DOI: 10.1111/vco.12186.
- Garbe, R. (2015). *Functional Annotation of the Bovine and Porcine Genomes*. Doctoral dissertation, University of Minnesota, Minnesota -USA. Available online at: <http://hdl.handle.net/11299/175436>.
- Gautier, M., Barcelona, R., Fritz, S., Grohs, C., Druet, T., Boichard, D., Eggen, A. and Meuwissen, H. (2006). Fine mapping and physical characterization of two linked quantitative trait loci affecting milk fat yield in dairy cattle on BTA26. *Genetics*, 172(1),425-436.
- Guo, B., Greenwood, L., Cafe, M., Zhou, G., Zhang, W. and Dalrymple, P. (2015). Transcriptome analysis of cattle muscle identifies potential markers for skeletal muscle growth rate and major cell types. *BMC Genomics*, 16(1), 177. doi:10.1186/s12864-015-1403-x.
- Hallé, C., Goff, K., Petit, V., Blouin, R. and Palin, F. (2015). Effects of different n-6: n-3 fatty acid ratios and of enterolactone on gene expression and PG secretion in bovine endometrial cells. *British Journal of Nutrition*, 113(01),56-71.
- Hendriks, J., Dilaver, G., Noordman, E., Kremer, B. and Fransen, A. (2009). PTPRR protein tyrosine phosphatase isoforms and locomotion of vesicles and mice. *The Cerebellum*, 8(2),80-88.
- Jeong, H., Song, D., Seo, M., Caetano-Anollés, K., Kim, J., Kwak, W., Oh, D., Kim, E., Jeong, K., Cho, S. and Kim, H. (2015). Exploring evidence of positive selection reveals genetic basis of meat quality traits in Berkshire pigs through whole genome sequencing. *BMC Genetics*, 16(1), 104. doi:10.1186/s12863-015-0265-1.
- Kärst, S., Cheng, R., Schmitt, O., Yang, H., de Villena, M., Palmer, A. and Brockmann, A. (2011). Genetic determinants for intramuscular fat content and water-holding capacity in mice selected for high muscle mass. *Mammalian Genome*, 22(9-10),530-543.
- Khatri, P., Frenette, G., Sullivan, R., Hoffmann, B. and Schuler, G. (2011). Expression of SULT1E1 protein in bovine placentomes: evidence for localization in uninucleated trophoblast cells. *Placenta*, 32(6),431-440.

- Mamiya, C., Hennesy, Z., Zhou, R. and Wagner, C. (2008). Changes in attack behavior and activity in EphA5 knockout mice. *Brain Research*, 1205, pp.91-99.
- Martchenko, D., Prewer, E., Latch, E. K., Kyle, C. J., and Shafer, A. B. (2018). *Population Genomics of Ungulates*. Springer International Publishing, Canada. doi: [org/10.1007/13836\\_2018\\_30](https://doi.org/10.1007/13836_2018_30).
- McCabe, M., Waters, S., Morris, D., Kenny, D., Lynn, D. and Creevey, C. (2012). RNA-seq analysis of differential gene expression in liver from lactating dairy cows divergent in negative energy balance. *BMC Genomics*, 13(1), 193. doi:10.1186/1471-2164-13-193
- Mészáros, G., Eaglen, S. and Waldmann, P. (2014). A genome wide association study for longevity in cattle. *Open Journal of Genetics*. 4, (1) 46. doi: 10.4236/ojgen.2014.41007
- Moreno-Sánchez, N., Rueda, J., Carabaño, J., Reverter, A., McWilliam, S., González, C. and Díaz, C. (2010). Skeletal muscle specific genes networks in cattle. *Functional and Integrative Genomics*, 10(4),609-618.
- Ortega, S., Denicol, C., Cole, B., Null, J. and Hansen, J. (2016). Use of single nucleotide polymorphisms in candidate genes associated with daughter pregnancy rate for prediction of genetic merit for reproduction in Holstein cows. *Animal Genetics*. 47, 288–297, doi: 10.1111/age.12420.
- Pandey, K., Mizukami, Y., Watanabe, K., Sakaguti, S., and Kadokawa, H. (2017). Deep sequencing of the transcriptome in the anterior pituitary of heifers before and after ovulation. *Journal of Veterinary Medical Science*, 79(6), 1003-1012. doi: 10.1292/jvms.16-0531
- Pausch, H., Wurmser, C., Edel, C., Emmerling, R., Götz, U. and Ruedi, F. (2014). Exploiting whole genome sequence data for the identification of causal trait variants in cattle. *Proc. 10th World Congress. Genetics Applied Livestock Production. Vancouver, Canada: WCGALP*. doi:10.13140/2.1.1397.6 966
- Perdigao, F., Gomez, S., Pimenta, S. and De Marco, L. (2004). Ameloblastin gene (AMBN) mutations associated with epithelial odontogenic tumors. *Oral Oncology*, 40(8), 841-846.

- Ponsuksili, S., Murani, E., Schwerin, M., Schellander, K., Tesfaye, D. and Wimmers, K. (2012). Gene expression and DNA-methylation of bovine pretransfer endometrium depending on its receptivity after in vitro-produced embryo transfer. *PLoS One*, 7(8), p.e42402.
- Qanbari, S., Pimentel, G., Tetens, J., Thaller, G., Lichtner, P., Sharifi, R. and Simianer, H. (2010). A genome-wide scan for signatures of recent selection in Holstein cattle. *Animal Genetics*, 41(4), 377-389. doi:10.1111/j.1365-2052.2009.02016.x
- Randhawa, A., Khatkar, S., Thomson, C. and Raadsma, W. (2016). A Meta-Assembly of Selection Signatures in Cattle. *PLoS One*, 11(4), p.e0153013. doi: 10.1371/journal.pone.0153013
- Ren, S., Lu, G., Ota, A., Zhou, H., Vondriska, M., Lane, F. and Wang, Y. (2014). IRE1 phosphatase PP2Ce regulates adaptive ER stress response in the postpartum mammary gland. *PLoS One*. 9(11), p.e111606. doi: 10.1371/journal.pone.0111606
- Ringseis, R., Windisch, W. and Eder, K. (2016). Transcript profiling in the liver of early-lactating dairy cows fed conjugated linoleic acid. *Genomics Data*, 10, 101-103. doi:10.1016/j.gdata.2016.10.004
- Rothhammer, S., Seichter, D., Förster, M., and Medugorac, I. (2013). A genome-wide scan for signatures of differential artificial selection in ten cattle breeds. *BMC Genomics*, 14(1), 908. doi:10.1186/1471-2164-14-908
- Seo, J., Osorio, S., Schmitt, E., Corrêa, N., Bertoni, G., Trevisi, O. and Looor, J. (2014). Hepatic purinergic signaling gene network expression and its relationship with inflammation and oxidative stress biomarkers in blood from periparturient dairy cattle. *Journal of Dairy Science*, 97(2),861-873. doi:10.3168/jds.2013-7379
- Seong, J., Yoon, H. and Kong, S. (2016). Identification of microRNA and target gene associated with marbling score in Korean cattle (Hanwoo). *Genes and Genomics*, 38(6),529-538. doi :10.1007/s13258-016-0401-y
- Sevane, N., Armstrong, E., Wiener, P., Wong, P., Dunner, S. and GemQual Consortium, (2014). Polymorphisms in twelve candidate genes are associated with growth, muscle lipid profile and meat quality traits in eleven European cattle breeds. *Molecular Biology Reports*, 41(7), 4721-4731. doi.org/10.1007/s11033-014-3343-y

- Shin, H., Lee, J., Cho, S., Kim, J., Hwang, Y., Lee, K., Jeong, J., Yoon, D. and Kim, H. (2014). Deleted copy number variation of Hanwoo and Holstein using next generation sequencing at the population level. *BMC Genomics*, 15(1),240. doi:10.1186/1471-2164-15-240
- Stefely, A., Licitra, F., Laredj, L., Reidenbach, G., Kemmerer, A., Grangeray, A., Jaeg-Ehret, T., Minogue, E., Ulbrich, A., Hutchins, D. and Wilkerson, M. (2016). Cerebellar ataxia and coenzyme Q deficiency through loss of unorthodox kinase activity. *Molecular Cell*. 63(4), 608- 620.
- Ushizawa, K., Takahashi, T., Hosoe, M., Ishiwata, H., Kaneyama, K., Kizaki, K. and Hashizume, K. (2007). Global gene expression analysis and regulation of the principal genes expressed in bovine placenta in relation to the transcription factor AP-2 family. *Reproductive Biology and Endocrinology*, 5(1),17. doi:10.1186/1477-7827-5-17
- Walser, M. (2012). *Validation of P2RX7 and TMEM132D as susceptibility genes for depression using genetic mouse models*. Doctoral dissertation, München, Technische Universität München, Diss, Germany. Available online at: <https://mediatum.ub.tum.de/doc/1093008/1093008.pdf>
- Wang, Q., Xing, M., Fan, H., Wang, S., Zhang, K., Wang, W., Qi, J., Yang, M., Yang, J., Ren, N. and Cui, J. (2009). The novel lipopolysaccharide-binding protein CRISPLD2 is a critical serum protein to regulate endotoxin function. *The Journal of Immunology*, 183(10),6646-6656. doi:10.4049/jimmunol.0802348
- Wu, J., Zhang, J., Teng, M., Yang, L., Yi, J., Ha, G., Cooke, S., Clempson, M., Pollot, E., Wathes, C. and Zhang, S. (2014). Genome-wide association study of fertility traits in dairy cows. *Advances in Animal Biosciences*, 5(2),256. doi:10.1017/S2040470014000090
- Yu, L., Lee, M., Kang, J., Jeong, J., Sang, C., Jeon, T. and Lee, H. (2009). Identification of differentially expressed genes between preadipocytes and adipocytes using affymetrix bovine genome array. *Journal of Animal Science and Technology*, 51(6),443-452. doi: 10.5187/JA ST.2009.51.6.443
- Zancanella, V., Giantin, M., Lopparelli, M., Nebbia, C. and Dacasto, M. (2013). Tissue distribution and phenobarbital induction of target SLC-and ABC-transporters in cattle. *Journal of Veterinary Pharmacology and Therapeutics*, 36(4),358-369. doi.org/10.1111/j.1365-2885. 2012.01427.x

Zhang, Z. (2012). *Influence of Dietary Selenium Supplementation Form on Hepatic Transcriptome Profiles of Maturing Beef Heifers*.75-76. Master thesis, College of Agriculture, University of Kentucky, USA. Available online at: [https://uknowledge.uky.edu/cgi/viewcontent.cgi?referer=&httpsredir=1&article=1006&context=animalsci\\_etds](https://uknowledge.uky.edu/cgi/viewcontent.cgi?referer=&httpsredir=1&article=1006&context=animalsci_etds)
