# Supplementary material for: Genome Analysis Reveals Genetic Admixture and Signature of Selection for Productivity and Environmental Traits in Iraqi Cattle
Source: PubMed Central journal article supplement (PMC6646475; doi:10.3389/fgene.2019.00609), 2019-07-16
Supplement: Table_9.pdf [file Table_9.pdf]

**Supplementary Table S9:** Overlap and non-overlap candidate genes detected by analysis of *iHS* and *Rsb* (Rustaqi and Jenoubi) with *Rsb* analysis of Rustaqi *versus* Holstein, Nellore and N'Dama Guinea breeds.

| Chr. Name | Candidate gene |           | <i>iHS</i> = 4 /- 4 (threshold) |         | <i>Rsb</i> = 5 /- 5 (threshold) |         | <i>Rsb</i> = 3.5 threshold | <i>Rsb</i> =3 threshold | <i>Rsb</i> = 3.5 threshold | Gene ID          |
|-----------|----------------|-----------|---------------------------------|---------|---------------------------------|---------|----------------------------|-------------------------|----------------------------|------------------|
|           | Start          | End       | Rustaqi                         | Jenoubi | Rustaqi                         | Jenoubi | Rustaqi X Hol.             | Rustaqi X Nellore       | Rustaqi X N' Dama G.       |                  |
| 1         | 43730028       | 44124279  | N                               | N       | N                               | N       | Y                          | N                       | N                          | <i>CMSS1</i>     |
| 1         | 56722581       | 56818961  | N                               | N       | Y                               | N       | N                          | N                       | Y                          | <i>CD96-201</i>  |
| 1         | 14791090       | 15026555  | N                               | Y       | N                               | Y       | N                          | N                       | N                          | <i>NCAM2</i>     |
| 1         | 18058709       | 18207251  | N                               | Y       | N                               | Y       | N                          | N                       | N                          | <i>TMPRSS15</i>  |
| 1         | 18208866       | 18233154  | N                               | N       | N                               | Y       | N                          | N                       | N                          | <i>CHODL</i>     |
| 1         | 107241227      | 107576086 | Y                               | N       | N                               | N       | N                          | N                       | N                          | <i>PPM1L</i>     |
| 1         | 112455492      | 112013084 | N                               | N       | N                               | N       | N                          | Y                       | N                          | <i>KCNAB1</i>    |
| 1         | 141349995      | 141401851 | Y                               | N       | N                               | N       | N                          | N                       | N                          | <i>IGSF5</i>     |
| 3         | 8985751        | 8969737   | N                               | N       | N                               | N       | N                          | N                       | Y                          | <i>SLAMF7</i>    |
| 3         | 8985751        | 8969737   | N                               | N       | N                               | N       | N                          | N                       | Y                          | <i>SLAMF6</i>    |
| 3         | 103353700      | 103422206 | Y                               | N       | N                               | N       | N                          | N                       | N                          | <i>CFAP57</i>    |
| 4         | 46912545       | 46858942  | N                               | N       | N                               | N       | N                          | N                       | Y                          | <i>PUS7</i>      |
| 4         | 47228658       | 46974646  | N                               | N       | N                               | N       | N                          | N                       | Y                          | <i>ATXN7L1</i>   |
| 4         | 117411239      | 117153120 | N                               | N       | N                               | N       | N                          | Y                       | N                          | <i>Novel</i>     |
| 4         | 119522032      | 119565916 | N                               | N       | N                               | N       | Y                          | N                       | N                          | <i>Novel</i>     |
| 4         | 120133801      | 120207828 | N                               | N       | N                               | N       | Y                          | N                       | N                          | <i>NCAPG2</i>    |
| 4         | 120230771      | 120306448 | N                               | N       | N                               | N       | Y                          | N                       | N                          | <i>ESYT2</i>     |
| 4         | 120326813      | 120373331 | N                               | N       | N                               | N       | Y                          | N                       | N                          | <i>WDR60</i>     |
| 4         | 120427915      | 120494453 | N                               | N       | N                               | N       | Y                          | N                       | N                          | <i>VIPR2</i>     |
| 5         | 121181282      | 121188623 | N                               | N       | N                               | N       | N                          | N                       | N                          | <i>TRABD</i>     |
| 5         | 121164873      | 121099143 | N                               | N       | N                               | N       | N                          | N                       | Y                          | <i>MOV10L1</i>   |
| 5         | 121188623      | 121181282 | N                               | N       | N                               | N       | N                          | N                       | Y                          | <i>TRABD</i>     |
| 5         | 43746464       | 43872342  | N                               | N       | Y                               | N       | N                          | N                       | N                          | <i>MYRFL-201</i> |
| 5         | 47534237       | 47703486  | N                               | N       | N                               | N       | Y                          | N                       | N                          | <i>GRIP1</i>     |
| 5         | 47713520       | 47751430  | N                               | N       | N                               | N       | Y                          | N                       | N                          | <i>HELB</i>      |



|    |           |           |   |   |   |   |   |   |   |                |
|----|-----------|-----------|---|---|---|---|---|---|---|----------------|
| 8  | 30529     | 228065    | N | N | N | N | Y | N | N | HIATL1         |
| 8  | 52712391  | 52292117  | N | N | N | N | N | Y | N | PCSK5          |
| 8  | 23386997  | 23662561  | N | Y | N | Y | N | N | N | FOCAD          |
| 8  | 92674692  | 92346242  | N | N | N | N | N | Y | N | PLPPR1         |
| 8  | 104995986 | 104797238 | N | N | N | N | N | N | Y | -              |
| 9  | 104927415 | 105066196 | N | N | N | N | N | N | N | WDR27          |
| 10 | 21573888  | 21521555  | N | N | N | N | N | N | Y | SLC7A8         |
| 10 | 44711724  | 44842190  | Y | N | N | N | N | N | N | GNG2           |
| 10 | 48949618  | 49750993  | Y | N | N | N | N | N | N | RORA<br>(RORA) |
| 10 | 47303876  | 47796327  | N | N | N | N | N | N | N | TLN2           |
| 10 | 51020033  | 51240077  | Y | N | N | N | N | N | N | MYO1E          |
| 11 | 38706659  | 38928773  | Y | N | N | N | N | N | N | CCDC85A        |
| 11 | 61759950  | 61969748  | N | N | N | N | N | N | N | WDPCP          |
| 11 | 64915358  | 64770131  | N | N | N | N | N | N | Y | MEIS1          |
| 11 | 101350157 | 101438043 | N | N | N | N | N | N | N | NUP214         |
| 12 | 27866074  | 28033238  | N | N | N | N | N | N | N | STARD13        |
| 12 | 28110415  | 28073218  | N | N | N | N | N | N | Y | KL             |
| 12 | 54777914  | 54825844  | N | N | N | N | Y | N | N | RBM26          |
| 13 | 36610252  | 36833259  | Y | N | N | N | N | N | N | MPP7           |
| 13 | 39202450  | 39632869  | Y | N | N | N | N | N | N | SLC24A3        |
| 13 | 43605579  | 43610260  | Y | N | N | N | N | N | N | UCN3           |
| 14 | 70303427  | 70236070  | N | N | N | N | N | N | Y | PTDSS1         |
| 15 | 30023047  | 30033583  | N | N | N | N | N | N | N | BCL9L          |
| 15 | 78254804  | 78044073  | N | N | N | N | N | N | Y | C11orf49       |
| 16 | 30656001  | 30703396  | Y | N | N | N | N | N | N | COQ8A          |
| 16 | 32381118  | 32471604  | Y | N | N | N | N | N | N | KIF26B         |
| 16 | 45621457  | 45879645  | Y | N | N | N | N | N | N | RERE           |
| 16 | 48314477  | 48181539  | N | N | N | N | N | N | Y | NPHP4          |
| 17 | 52565556  | 52785519  | N | N | N | Y | N | N | N | TMEM132B       |
| 18 | 8427455   | 8516798   | Y | N | N | N | N | N | N | PLCG2          |



|    |          |          |   |   |   |   |   |   |   |                 |
|----|----------|----------|---|---|---|---|---|---|---|-----------------|
| 26 | 5017714  | 5578654  | N | Y | N | Y | N | N | N | <i>PCDH15</i>   |
| 26 | 6906081  | 8343629  | Y | Y | N | Y | N | N | N | <i>PRKG1</i>    |
| 26 | 20694707 | 20777487 | Y | N | Y | N | N | N | N | <i>DNMBP</i>    |
| 26 | 20206332 | 20276715 | Y | N | N | N | N | N | N | <i>CNNM1</i>    |
| 26 | 20476402 | 20466104 | N | N | N | N | N | N | Y | <i>SLC25A28</i> |
| 26 | 20494069 | 20524328 | Y | N | N | N | N | N | N | <i>ENTPD7</i>   |
| 26 | 20613538 | 20684065 | Y | N | N | N | N | N | N | <i>ABCC2</i>    |
| 26 | 21670831 | 21630816 | N | N | N | N | N | N | Y | <i>SLF2</i>     |
| 26 | 21010622 | 21035035 | Y | N | N | N | N | N | N | <i>CWF19L1</i>  |
| 27 | 28963365 | 28969954 | N | N | N | N | N | N | N | <i>DUSP26</i>   |
| 28 | 25073149 | 25191276 | N | N | N | N | N | N | Y | <i>TET1</i>     |
| 28 | 28777941 | 28562368 | N | N | N | N | N | N | Y | <i>MICU1</i>    |
| 28 | 44545580 | 44597645 | N | N | N | N | N | N | N | <i>ZFAND4</i>   |
| 28 | 44545580 | 44597645 | N | N | N | N | N | N | N | <i>NOVEL</i>    |
| 28 | 44612704 | 44722610 | N | N | N | N | N | N | N | <i>NOVEL</i>    |

- Y indicate the test detect the gene region, N indicate the test did not detect the gene region.
- Red colour lines refer to immunity genes.
- Rsb for Rustaqi X Holstein, revealed 12 genes in Rustaqi (**green colour**): no genes shared between analysis of Rustaqi here & previous genes that appeared in just Iraqi analysis.
- In Rsb Rustaqi X Nellore analysis. 5 genes appeared (**violet colour**), no sharing genes with our previous Iraqi analysis.
- In Rsb Rustaqi X N'Dama G., 26 genes appeared (**brown colour**), 1 gene sharing with previous Iraqi breeds analysis (**CD96**).
