# Supplementary material for: Genome Analysis Reveals Genetic Admixture and Signature of Selection for Productivity and Environmental Traits in Iraqi Cattle
Source: PubMed Central journal article supplement (PMC6646475; doi:10.3389/fgene.2019.00609), 2019-07-16
Supplement: Table_11.pdf [file Table_11.pdf]

**Supplementary Table S11, a: Enrichr Tool Ontology for Jenoubi *iHS***

(Biological Process)

| <b>Index</b> | <b>Name</b>                                                                                    | <b>P-value</b> | <b>Adjusted p-value</b> | <b>Z-score</b> | <b>Combined score</b> |
|--------------|------------------------------------------------------------------------------------------------|----------------|-------------------------|----------------|-----------------------|
| 1            | positive regulation of apoptotic process (GO:0043065)                                          | 0.009527       | 0.02848                 | -3.76          | 13.38                 |
| 2            | sensory perception of light stimulus (GO:0050953)                                              | 0.005836       | 0.02413                 | -3.34          | 12.45                 |
| 3            | regulation of GTPase activity (GO:0043087)                                                     | 0.0004508      | 0.01984                 | -2.86          | 11.21                 |
| 4            | hippocampus development (GO:0021766)                                                           | 0.007129       | 0.02413                 | -2.99          | 11.12                 |
| 5            | regulation of insulin secretion involved in cellular response to glucose stimulus (GO:0061178) | 0.006482       | 0.02413                 | -2.75          | 10.26                 |
| 6            | cardiac muscle tissue development (GO:0048738)                                                 | 0.007129       | 0.02413                 | -2.60          | 9.70                  |
| 7            | heart contraction (GO:0060047)                                                                 | 0.006482       | 0.02413                 | -2.52          | 9.39                  |
| 8            | positive regulation of CREB transcription factor activity (GO:0032793)                         | 0.009709       | 0.02848                 | -2.58          | 9.19                  |
| 9            | negative regulation of platelet aggregation (GO:0090331)                                       | 0.004542       | 0.02413                 | -2.39          | 8.89                  |

|    |                                   |          |         |       |      |
|----|-----------------------------------|----------|---------|-------|------|
| 10 | equilibrioception<br>(GO:0050957) | 0.003894 | 0.02413 | -2.22 | 8.26 |
|----|-----------------------------------|----------|---------|-------|------|

**Supplementary Table S11, b:** Show Enrichr Tool Ontology for Jenoubi *iHS*  
(Molecular Function)

| <b>Index</b> | <b>Name</b>                                                                               | <b>P-value</b> | <b>Adjusted p-value</b> | <b>Z-score</b> | <b>Combined score</b> |
|--------------|-------------------------------------------------------------------------------------------|----------------|-------------------------|----------------|-----------------------|
| 1            | cysteine-type endopeptidase inhibitor activity involved in apoptotic process (GO:0043027) | 0.01549        | 0.02711                 | -3.26          | 11.76                 |
| 2            | transmembrane-ephrin receptor activity (GO:0005005)                                       | 0.005189       | 0.01816                 | -2.90          | 11.63                 |
| 3            | calcium channel regulator activity (GO:0005246)                                           | 0.009709       | 0.02265                 | -2.91          | 11.02                 |
| 4            | actin binding (GO:0003779)                                                                | 0.07829        | 0.1096                  | -4.35          | 9.62                  |
| 5            | GPI-linked ephrin receptor activity (GO:0005004)                                          | 0.003246       | 0.01816                 | -2.16          | 8.65                  |
| 6            | protein serine/threonine kinase activity (GO:0004674)                                     | 0.1763         | 0.2056                  | -4.92          | 7.78                  |
| 7            | protein homodimerization activity (GO:0042803)                                            | 0.3198         | 0.3198                  | -6.54          | 7.46                  |
